# Supplementary material for: Bifunctional Sn-Y zeolite triggers tandem catalytic conversion of glucose into 5-hydroxymethylfurfural
Source: Royal Society of Chemistry journal article supplement (doi:10.1039/d4qi01658k), 2024-01-01
Supplement: d4qi01658k1.pdf [file d4qi01658k1.pdf]

**Table S1** Sn contents in Sn-Y zeolites.

| No. | Sample name | Sn contents <sup>a</sup><br>(mmol g <sup>-1</sup> ) | Sn contents <sup>b</sup><br>(mmol g <sup>-1</sup> ) |
|-----|-------------|-----------------------------------------------------|-----------------------------------------------------|
| 1   | Sn-Y-12-150 | 0.061                                               | 0.065                                               |
| 2   | Sn-Y-12-75  | 0.121                                               | 0.118                                               |
| 3   | Sn-Y-12-50  | 0.184                                               | 0.179                                               |

<sup>a</sup> Determined by ICP analysis.

<sup>b</sup> Obtained from XPS analysis in Fig. 3C.

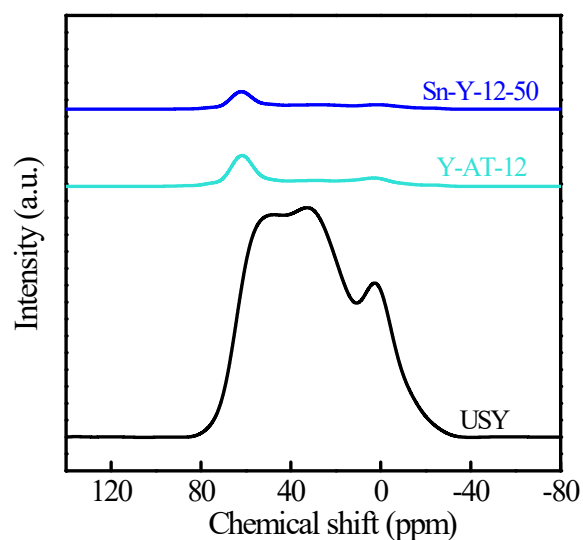

**Fig. S1** <sup>27</sup>Al NMR MAS spectra of parent USY, Y-AT-12, and Sn-Y-12-50 samples.

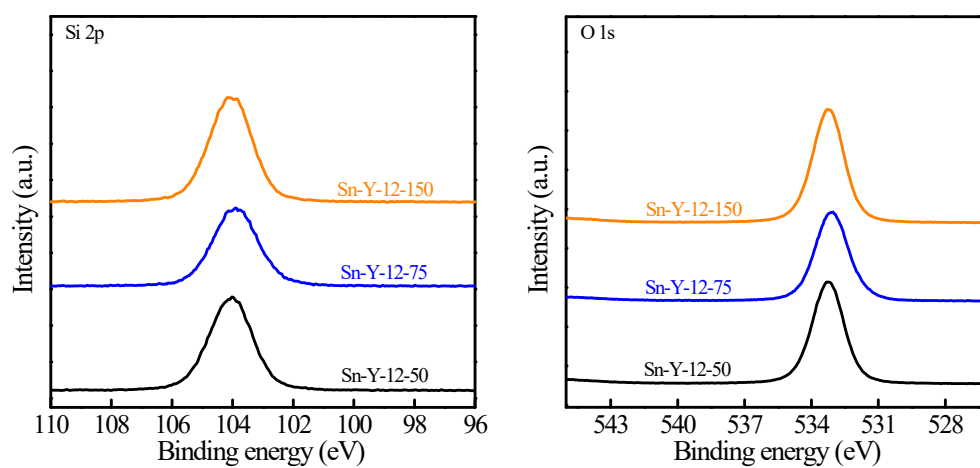

**Fig. S2** Si 2p and O 1s XPS spectra of Sn-Y-12-50, Sn-Y-12-75, and Sn-Y-12-150 samples with different Sn contents.

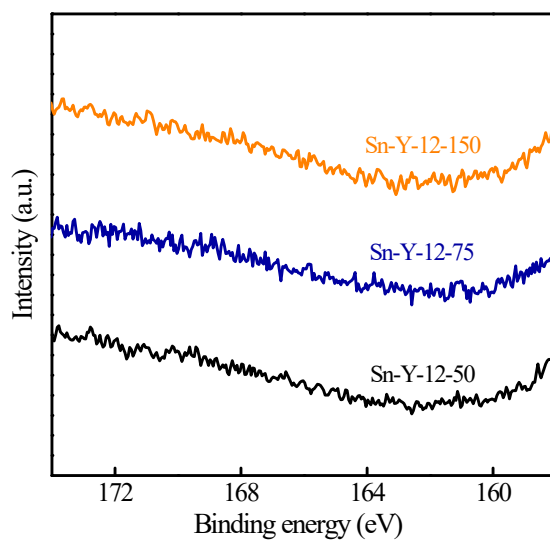

**Fig. S3** S 2p XPS spectra of Sn-Y-12-*n* with different Sn contents.

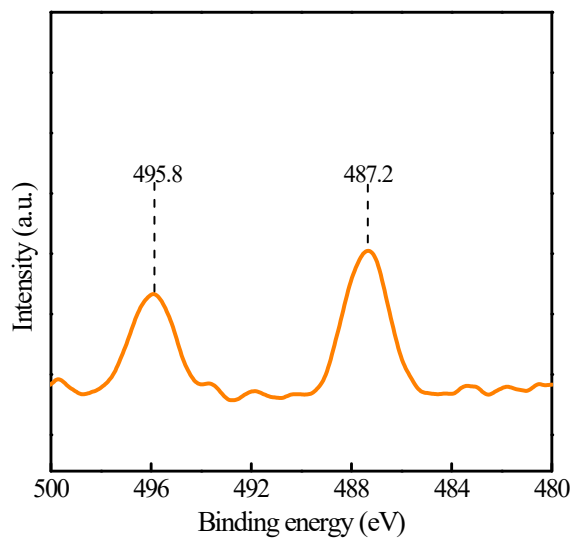

**Fig. S4** Sn 3d XPS spectra of Sn-Y-12-30 sample.

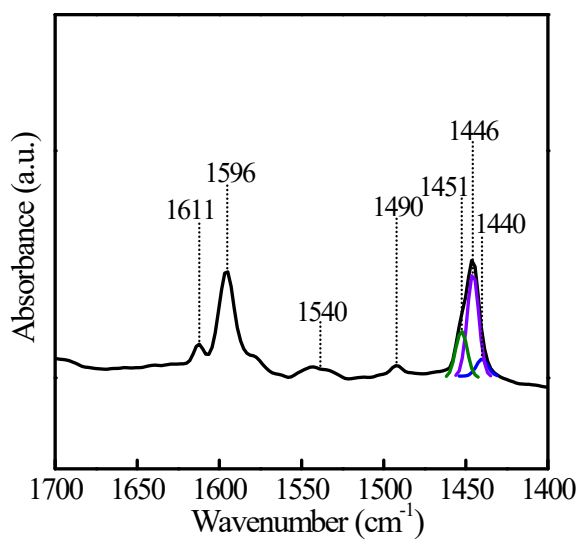

**Fig. S5** FT-IR spectra of Sn-Y-12-50 samples after desorbing pyridine at 200 °C for 1

h.

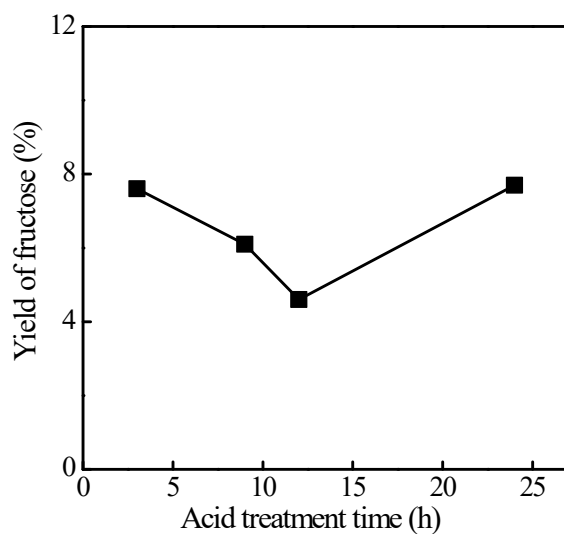

**Fig. S6** The dependence of fructose yield on the acid treatment time. Reaction conditions: catalyst, 50 mg; glucose, 0.5 mmol; water, 1 mL; DMSO, 3 mL; temperature, 160 °C; time, 2 h.

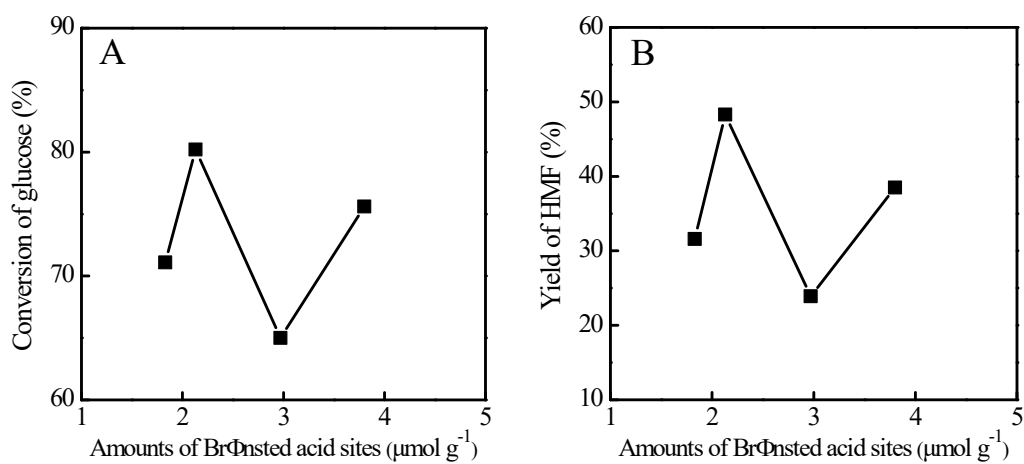

**Fig. S7 (A)** The dependence of glucose conversion on the Brønsted acid sites amounts.

**(B)** The dependence of HMF yield on the Brønsted acid sites amounts.

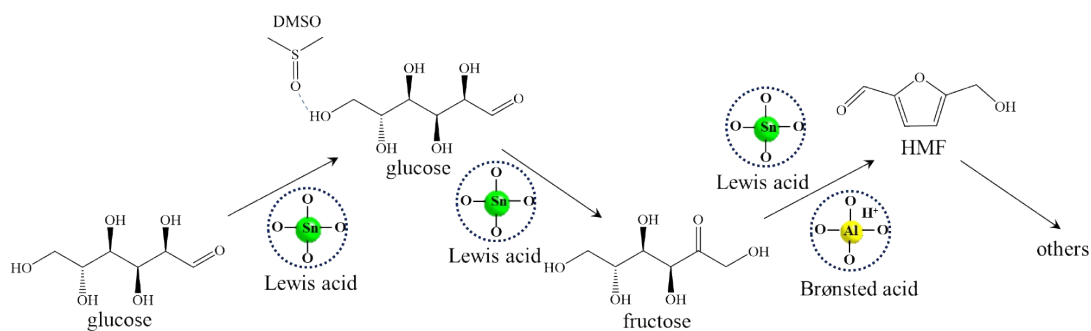

**Scheme S1** Reaction pathway of glucose conversion over Sn-Y zeolite in DMSO/H<sub>2</sub>O cosolvent.

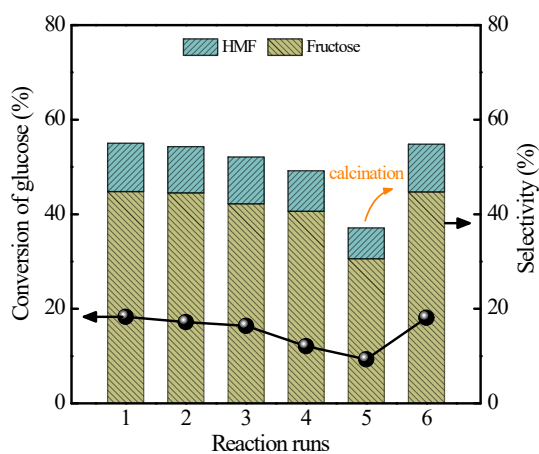

**Fig. S8** The reusability of Sn-Y-12-50 catalyst in the transformation of glucose to HMF.

Reaction condition: catalyst, 70 mg; glucose, 0.5 mmol; water, 1 mL; DMSO, 3 mL;

temperature, 160 °C; time, 15 min.
